# Supplementary material for: A Systematic Review and Meta-Analysis of Human Milk Feeding and Morbidity in Very Low Birth Weight Infants
Source: MDPI journal article supplement (doi:10.3390/nu10060707), 2018-05-31
Supplement: s1 [file s1]

# Supplementary Materials

## Table of Contents

|                                                     |    |
|-----------------------------------------------------|----|
| Record of database search strategies .....          | 2  |
| Ovid MEDLINE.....                                   | 2  |
| PubMed .....                                        | 3  |
| CINAHL .....                                        | 4  |
| Scopus.....                                         | 7  |
| Cochrane Central Register of Controlled Trials..... | 8  |
| References - excluded studies .....                 | 10 |

## Figures

|                                                                                                                               |    |
|-------------------------------------------------------------------------------------------------------------------------------|----|
| Figure S1. PRISMA diagram - selection of studies.....                                                                         | 9  |
| Figure S2. Forest plot of relative risk for the association of human milk and severe<br>necrotising enterocolitis .....       | 15 |
| Figure S3. Forest plot of relative risk for the association between human milk and severe<br>retinopathy of prematurity ..... | 21 |

## Tables

|                                                                        |    |
|------------------------------------------------------------------------|----|
| Table S1. Ovid MEDLINE search strategy .....                           | 2  |
| Table S2. CINAHL search strategy .....                                 | 4  |
| Table S3. Any necrotising enterocolitis: summary of findings.....      | 16 |
| Table S4. Severe necrotising enterocolitis: summary of findings.....   | 17 |
| Table S5. Late onset sepsis: summary of findings .....                 | 18 |
| Table S6. Bronchopulmonary dysplasia: summary of findings .....        | 19 |
| Table S7. Retinopathy of prematurity: summary of findings .....        | 20 |
| Table S8. Severe retinopathy of prematurity: summary of findings ..... | 22 |
| Table S9. Neurodevelopment: summary of findings.....                   | 23 |

## Record of database search strategies - run 13/6/17

Ovid MEDLINE(R) Epub Ahead of Print, In-Process & Other Non-Indexed Citations,  
Ovid MEDLINE(R) Daily, Ovid MEDLINE and Versions(R)

Table S1. Ovid MEDLINE search strategy

| #  | Searches                                                                                                                                                                                                                | Results |
|----|-------------------------------------------------------------------------------------------------------------------------------------------------------------------------------------------------------------------------|---------|
| 1  | Infant, Premature/ OR Infants, Extremely premature/ OR Infant, Low birth weight/ OR Infant, Very Low Birth Weight/ OR Intensive care units, Neonatal/ OR Intensive care, Neonatal/ OR Premature birth/                  | 83735   |
| 2  | ((low birthweight OR low birth weight OR VLBW OR ELBW OR Prematur* OR Preterm OR Pre-term) adj2 (Infant* OR Neonat* OR newborn* OR new-born* OR baby* OR babies)) OR neonatal intensive care OR NICU).tw,kw.            | 73321   |
| 3  | or/1-2                                                                                                                                                                                                                  | 111350  |
| 4  | Milk, Human/ OR Breast feeding/ OR Milk banks/ OR Breast milk expression/                                                                                                                                               | 46962   |
| 5  | ((breastmilk OR (human OR breast OR mother* OR maternal OR express* OR donor* OR donated OR bank*)) adj3 milk*).tw,kw.                                                                                                  | 23289   |
| 6  | (breastfeed* OR breastfed OR ((breast OR HM) adj (fed OR feed*))).tw,kw.                                                                                                                                                | 36982   |
| 7  | ((EHM OR MOM OR PDM) and milk).tw,kw.                                                                                                                                                                                   | 45      |
| 8  | Enteral Nutrition/                                                                                                                                                                                                      | 18724   |
| 9  | (Enteral* adj1 (nutrition* OR support OR feed*)).tw,kw.                                                                                                                                                                 | 12409   |
| 10 | or/4-9                                                                                                                                                                                                                  | 90007   |
| 11 | infant, premature, diseases/                                                                                                                                                                                            | 19459   |
| 12 | ((prematur* OR preterm OR pre-term) adj2 disease*).tw,kw.                                                                                                                                                               | 3129    |
| 13 | Enterocolitis, Necrotizing/                                                                                                                                                                                             | 2706    |
| 14 | (Necroti?ing enterocolitis OR NEC).tw,kw.                                                                                                                                                                               | 8044    |
| 15 | Bronchopulmonary dysplasia/ OR Respiratory Distress Syndrome, Newborn/                                                                                                                                                  | 15536   |
| 16 | (Bronchopulmonary dysplasia OR broncho-pulmonary dysplasia OR BPD OR lung disease* OR lung disorder* OR immature lung* OR respiratory distress).tw,kw.                                                                  | 92321   |
| 17 | "retinopathy of prematurity"/                                                                                                                                                                                           | 5206    |
| 18 | ("Retinopathy of prematurity" OR ROP).tw,kw.                                                                                                                                                                            | 6468    |
| 19 | exp Sepsis/ OR exp Infection/                                                                                                                                                                                           | 726204  |
| 20 | (sepsis OR sepsis OR septic OR septic?emi* OR infect* OR bacteria* OR bacter?emi* OR microorganism* OR micro-organism* OR blood poisoning* OR pyoh?emi* OR py?emi*).tw,kw.                                              | 2051314 |
| 21 | Child development/ OR Brain/ OR Intelligence/ OR Cognition/ OR Executive function/ OR Motor skills/ OR Motor activity/                                                                                                  | 669535  |
| 22 | Intelligence tests/ OR Neuropsychological tests/                                                                                                                                                                        | 95266   |
| 23 | ((infan* OR child*) adj2 development*).tw,kw.                                                                                                                                                                           | 26347   |
| 24 | ((brain OR neurologic* OR cognitive* OR intellectual* OR motor OR psychomotor) adj2 development*).tw,kw.                                                                                                                | 37412   |
| 25 | (neurodevelopment* OR neuro-development* OR neurocognitive* OR neuro-cognitive OR neurobehavio?r* OR neuro-behavio?r* OR neuropsycholog* OR neuro-psycholog* OR cognition OR intelligence OR executive function).tw,kw. | 166261  |
| 26 | or/11-25                                                                                                                                                                                                                | 3318491 |
| 27 | 3 and 10 and 26                                                                                                                                                                                                         | 2994    |
| 28 | exp animals/ not (exp animals/ and humans/)                                                                                                                                                                             | 4417385 |

|    |                                |      |
|----|--------------------------------|------|
| 29 | 27 not 28                      | 2945 |
| 30 | limit 29 to english language   | 2677 |
| 31 | limit 30 to yr="1990 -Current" | 2441 |

### PubMed (non-indexed subset only)

N=373

(((((“low birthweight”[tiab] OR “low birth weight”[tiab] OR VLBW[tiab] OR ELBW[tiab] OR Prematur\*[tiab] OR Preterm[tiab] OR “Pre-term”[tiab]) AND (Infant\*[tiab] OR Neonat\*[tiab] OR newborn\*[tiab] OR “new-born”[tiab] OR baby\*[tiab] OR babies[tiab])) OR “neonatal intensive care”[tiab] OR NICU[tiab]) AND (((breastmilk[tiab] OR (human[tiab] OR breast[tiab] OR mother\*[tiab] OR maternal[tiab] OR express\*[tiab] OR donor\*[tiab] OR donated[tiab] OR bank\*[tiab])) AND milk\*[tiab]) OR (breastfeed\*[tiab] OR breastfed[tiab] OR ((breast[tiab] OR HM[tiab]) AND (fed[tiab] OR feed\*[tiab])))) OR ((EHM[tiab] OR MOM[tiab] OR PDM[tiab]) AND milk[tiab]) OR (Enteral\*[tiab] AND (nutrition\*[tiab] OR support[tiab] OR feed\*[tiab])))) AND (((prematur\*[tiab] OR preterm[tiab] OR “pre-term” [tiab]) AND disease\*[tiab]) OR “Necrotising enterocolitis”[tiab] OR “Necrotizing enterocolitis”[tiab] OR NEC[tiab] OR “Bronchopulmonary dysplasia”[tiab] OR “broncho-pulmonary dysplasia”[tiab] OR BPD[tiab] OR “lung disease”[tiab] OR “lung disorder”[tiab] OR “immature lung”[tiab] OR “respiratory distress”[tiab] OR “Retinopathy of prematurity”[tiab] OR ROP[tiab] OR sepsis[tiab] OR sepsis[tiab] OR septic[tiab] OR septicemi\*[tiab] OR septicemia\*[tiab] OR infect\*[tiab] OR bacteria\*[tiab] OR bacteremi\*[tiab] OR bacteraemi\*[tiab] OR microorganism\*[tiab] OR “micro-organism”[tiab] OR “blood poisoning”[tiab] OR pyohemi\*[tiab] OR pyohaemi\*[tiab] OR pyemi\*[tiab] OR pyaemi\*[tiab] OR ((brain[tiab] OR neurologic\*[tiab] OR cognitive\*[tiab] OR intellectual\*[tiab] OR motor[tiab] OR psychomotor[tiab]) AND development\*[tiab]) OR ((infan\*[tiab] OR child\*[tiab]) AND development\*[tiab]) OR neurodevelopment\*[tiab] OR “neuro-development”[tiab] OR neurocognitive\*[tiab] OR “neuro-cognitive”[tiab] OR neurobehavior\*[tiab] OR neurobehaviour\*[tiab] OR “neuro-behavior”[tiab] OR “neuro-behaviour”[tiab] OR neuropsycholog\*[tiab] OR “neuro-psycholog”[tiab] OR cognition[tiab] OR intelligence[tiab] OR “executive function”[tiab]) AND English[la] AND 1990:2017[dp]) NOT Medline[sb]

## CINAHL (EBSCOhost)

Table S2. CINAHL search strategy

| #   | Query                                                                                                                                                                                                                                                                                                                                                                                                                                                                                                                                                            | Limiters/Expanders            | Results |
|-----|------------------------------------------------------------------------------------------------------------------------------------------------------------------------------------------------------------------------------------------------------------------------------------------------------------------------------------------------------------------------------------------------------------------------------------------------------------------------------------------------------------------------------------------------------------------|-------------------------------|---------|
| S1  | (MH "Infant, Premature") OR (MH "Infant, Low Birth Weight") OR (MH "Infant, Very Low Birth Weight")                                                                                                                                                                                                                                                                                                                                                                                                                                                              | Search modes - Boolean/Phrase | 17,057  |
| S2  | (MH "Childbirth, Premature")                                                                                                                                                                                                                                                                                                                                                                                                                                                                                                                                     | Search modes - Boolean/Phrase | 5,058   |
| S3  | (MH "Intensive Care, Neonatal") OR (MH "Intensive Care Units, Neonatal")                                                                                                                                                                                                                                                                                                                                                                                                                                                                                         | Search modes - Boolean/Phrase | 10,284  |
| S4  | TI ( (((“low birthweight” OR “low birth weight” OR VLBW OR ELBW OR Prematur* OR Preterm OR “Pre-term”) N1 (Infant* OR Neonat* OR newborn* OR “new-born*” OR baby* OR babies)) OR “neonatal intensive care” OR NICU) ) OR AB ( (((“low birthweight” OR “low birth weight” OR VLBW OR ELBW OR Prematur* OR Preterm OR “Pre-term”) N1 (Infant* OR Neonat* OR newborn* OR “new-born*” OR baby* OR babies)) OR “neonatal intensive care” OR NICU) )                                                                                                                   | Search modes - Boolean/Phrase | 17,903  |
| S5  | S1 OR S2 OR S4                                                                                                                                                                                                                                                                                                                                                                                                                                                                                                                                                   | Search modes - Boolean/Phrase | 28,457  |
| S6  | (MH "Milk, Human") OR (MH "Donor Milk")                                                                                                                                                                                                                                                                                                                                                                                                                                                                                                                          | Search modes - Boolean/Phrase | 3,094   |
| S7  | (MH "Milk Banks")                                                                                                                                                                                                                                                                                                                                                                                                                                                                                                                                                | Search modes - Boolean/Phrase | 289     |
| S8  | (MH "Breast Pumps")                                                                                                                                                                                                                                                                                                                                                                                                                                                                                                                                              | Search modes - Boolean/Phrase | 289     |
| S9  | (MH "Breast Feeding") OR (MH "Milk Expression")                                                                                                                                                                                                                                                                                                                                                                                                                                                                                                                  | Search modes - Boolean/Phrase | 13,429  |
| S10 | TI ( (((breastmilk OR (human OR breast OR mother* OR maternal OR express* OR donor* OR donated OR bank*)) N2 milk*) OR (breastfeed* OR breastfed OR ((breast OR HM) N0 (fed OR feed*))) OR ((EHM OR MOM OR PDM) AND milk) OR (Enteral* N0 (nutrition* OR support OR feed*))) ) OR AB ( (((breastmilk OR (human OR breast OR mother* OR maternal OR express* OR donor* OR donated OR bank*)) N2 milk*) OR (breastfeed* OR breastfed OR ((breast OR HM) N0 (fed OR feed*))) OR ((EHM OR MOM OR PDM) AND milk) OR (Enteral* N0 (nutrition* OR support OR feed*))) ) | Search modes - Boolean/Phrase | 16,416  |
| S11 | (MH "Enteral Nutrition")                                                                                                                                                                                                                                                                                                                                                                                                                                                                                                                                         | Search modes - Boolean/Phrase | 5,571   |
| S12 | S6 OR S7 OR S8 OR S9 OR S10 OR S11                                                                                                                                                                                                                                                                                                                                                                                                                                                                                                                               | Search modes - Boolean/Phrase | 25,094  |
| S13 | (MH "Infant, Newborn, Diseases") OR (MH "Bronchopulmonary Dysplasia") OR (MH "Enterocolitis, Necrotizing") OR (MH "Respiratory Distress Syndrome") OR (MH "Retinopathy of Prematurity") OR (MH "Neonatal Sepsis")                                                                                                                                                                                                                                                                                                                                                | Search modes - Boolean/Phrase | 6,483   |

| #   | Query                                                                                                                                                                                                                                                                                                                                                                                                                                                                                                                                                                                                                                                                                                                                                                                                                                                                                                                                                                                                                                                                                                                                                                                                                                                                                                                                                                                                                                                                                                                                                 | Limiters/Expanders               | Results |
|-----|-------------------------------------------------------------------------------------------------------------------------------------------------------------------------------------------------------------------------------------------------------------------------------------------------------------------------------------------------------------------------------------------------------------------------------------------------------------------------------------------------------------------------------------------------------------------------------------------------------------------------------------------------------------------------------------------------------------------------------------------------------------------------------------------------------------------------------------------------------------------------------------------------------------------------------------------------------------------------------------------------------------------------------------------------------------------------------------------------------------------------------------------------------------------------------------------------------------------------------------------------------------------------------------------------------------------------------------------------------------------------------------------------------------------------------------------------------------------------------------------------------------------------------------------------------|----------------------------------|---------|
| S14 | (MH "Infection+")                                                                                                                                                                                                                                                                                                                                                                                                                                                                                                                                                                                                                                                                                                                                                                                                                                                                                                                                                                                                                                                                                                                                                                                                                                                                                                                                                                                                                                                                                                                                     | Search modes -<br>Boolean/Phrase | 90,193  |
| S15 | (MH "Child Development") OR (MH "Infant Development")                                                                                                                                                                                                                                                                                                                                                                                                                                                                                                                                                                                                                                                                                                                                                                                                                                                                                                                                                                                                                                                                                                                                                                                                                                                                                                                                                                                                                                                                                                 | Search modes -<br>Boolean/Phrase | 14,958  |
| S16 | (MH "Brain")                                                                                                                                                                                                                                                                                                                                                                                                                                                                                                                                                                                                                                                                                                                                                                                                                                                                                                                                                                                                                                                                                                                                                                                                                                                                                                                                                                                                                                                                                                                                          | Search modes -<br>Boolean/Phrase | 21,857  |
| S17 | (MH "Intelligence")                                                                                                                                                                                                                                                                                                                                                                                                                                                                                                                                                                                                                                                                                                                                                                                                                                                                                                                                                                                                                                                                                                                                                                                                                                                                                                                                                                                                                                                                                                                                   | Search modes -<br>Boolean/Phrase | 2,999   |
| S18 | (MH "Cognition")                                                                                                                                                                                                                                                                                                                                                                                                                                                                                                                                                                                                                                                                                                                                                                                                                                                                                                                                                                                                                                                                                                                                                                                                                                                                                                                                                                                                                                                                                                                                      | Search modes -<br>Boolean/Phrase | 23,286  |
| S19 | (MH "Executive Function")                                                                                                                                                                                                                                                                                                                                                                                                                                                                                                                                                                                                                                                                                                                                                                                                                                                                                                                                                                                                                                                                                                                                                                                                                                                                                                                                                                                                                                                                                                                             | Search modes -<br>Boolean/Phrase | 604     |
| S20 | (MH "Motor Skills") OR (MH "Psychomotor Performance")                                                                                                                                                                                                                                                                                                                                                                                                                                                                                                                                                                                                                                                                                                                                                                                                                                                                                                                                                                                                                                                                                                                                                                                                                                                                                                                                                                                                                                                                                                 | Search modes -<br>Boolean/Phrase | 10,397  |
| S21 | (MH "Motor Activity")                                                                                                                                                                                                                                                                                                                                                                                                                                                                                                                                                                                                                                                                                                                                                                                                                                                                                                                                                                                                                                                                                                                                                                                                                                                                                                                                                                                                                                                                                                                                 | Search modes -<br>Boolean/Phrase | 4,705   |
| S22 | (MH "Intelligence Tests")                                                                                                                                                                                                                                                                                                                                                                                                                                                                                                                                                                                                                                                                                                                                                                                                                                                                                                                                                                                                                                                                                                                                                                                                                                                                                                                                                                                                                                                                                                                             | Search modes -<br>Boolean/Phrase | 4,483   |
| S23 | (MH "Neuropsychological Tests")                                                                                                                                                                                                                                                                                                                                                                                                                                                                                                                                                                                                                                                                                                                                                                                                                                                                                                                                                                                                                                                                                                                                                                                                                                                                                                                                                                                                                                                                                                                       | Search modes -<br>Boolean/Phrase | 19,216  |
| S24 | TI ( (((premat* OR preterm OR "pre-term") N1 disease*) OR "Necrotising enterocolitis" OR "Necrotizing enterocolitis" OR NEC OR "Bronchopulmonary dysplasia" OR "broncho-pulmonary dysplasia" OR BPD OR "lung disease*" OR "lung disorder*" OR "immature lung*" OR "respiratory distress" OR "Retinopathy of prematurity" OR ROP OR sepsis OR sepsis OR septic OR septicemi* OR septicemi* OR infect* OR bacteria* OR bacteremi* OR bacteraemi* OR microorganism* OR "micro-organism*" OR "blood poisoning*" OR pyohemi* OR pyohaemi* OR pyemi* OR pyaemi* OR ((brain OR neurologic* OR cognitive* OR intellectual* OR motor OR psychomotor) N1 development*) OR ((infan* OR child*) N1 development*) OR neurodevelopment* OR "neuro-development*" OR neurocognitive* OR "neuro-cognitive" OR neurobehavior* OR neurobehaviour* OR "neuro-behavior*" OR "neuro-behaviour*" OR neuropsycholog* OR "neuro-psycholog*" OR cognition OR intelligence OR "executive function") ) OR AB ( (((premat* OR preterm OR "pre-term") N1 disease*) OR "Necrotising enterocolitis" OR "Necrotizing enterocolitis" OR NEC OR "Bronchopulmonary dysplasia" OR "broncho-pulmonary dysplasia" OR BPD OR "lung disease*" OR "lung disorder*" OR "immature lung*" OR "respiratory distress" OR "Retinopathy of prematurity" OR ROP OR sepsis OR sepsis OR septic OR septicemi* OR septicemi* OR infect* OR bacteria* OR bacteremi* OR bacteraemi* OR microorganism* OR "micro-organism*" OR "blood poisoning*" OR pyohemi* OR pyohaemi* OR pyemi* OR pyaemi* OR ((brain OR | Search modes -<br>Boolean/Phrase | 177,981 |

| #   | Query                                                                                                                                                                                                                                                                                                                                                                                              | Limiters/Expanders                                                                                                   | Results |
|-----|----------------------------------------------------------------------------------------------------------------------------------------------------------------------------------------------------------------------------------------------------------------------------------------------------------------------------------------------------------------------------------------------------|----------------------------------------------------------------------------------------------------------------------|---------|
|     | neurologic* OR cognitive* OR intellectual* OR motor OR psychomotor) N1 development*) OR ((infan* OR child*) N1 development*) OR neurodevelopment* OR "neuro-development*" OR neurocognitive* OR "neuro-cognitive" OR neurobehavior* OR neurobehaviour* OR "neuro-behavior*" OR "neuro-behaviour*" OR neuropsycholog* OR "neuro-psycholog*" OR cognition OR intelligence OR "executive function") ) |                                                                                                                      |         |
| S25 | S13 OR S14 OR S15 OR S16 OR S17 OR S18 OR S19 OR S20 OR S21 OR S22 OR S23 OR S24                                                                                                                                                                                                                                                                                                                   | Search modes - Boolean/Phrase                                                                                        | 291,095 |
| S26 | S5 AND S12 AND S25                                                                                                                                                                                                                                                                                                                                                                                 | Search modes - Boolean/Phrase                                                                                        | 880     |
| S27 | S5 AND S12 AND S25                                                                                                                                                                                                                                                                                                                                                                                 | Narrow by Language:<br>- english<br>Search modes - Boolean/Phrase                                                    | 858     |
| S28 | S5 AND S12 AND S25                                                                                                                                                                                                                                                                                                                                                                                 | Limiters - Published<br>Date: 19900101-20171231<br>Narrow by Language:<br>- english<br>Search modes - Boolean/Phrase | 694     |

## Scopus

N=2773

TITLE-ABS-KEY((((("low birthweight" OR "low birth weight" OR VLBW OR ELBW OR Prematur\* OR Preterm OR "Pre-term") W/1 (Infant\* OR Neonat\* OR newborn\* OR "new-born\*" OR baby\* OR babies)) OR "neonatal intensive care" OR NICU) AND (((breastmilk OR (human OR breast OR mother\* OR maternal OR express\* OR donor\* OR donated OR bank\*)) W/2 milk\*) OR (breastfeed\* OR breastfed OR ((breast OR HM) W/0 (fed OR feed\*))) OR ((EHM OR MOM OR PDM) AND milk) OR (Enteral\* W/0 (nutrition\* OR support OR feed\*))) AND (((prematu\* OR preterm OR "pre-term") W/1 disease\*) OR "Necrotising enterocolitis" OR "Necrotizing enterocolitis" OR NEC OR "Bronchopulmonary dysplasia" OR "broncho-pulmonary dysplasia" OR BPD OR "lung disease\*" OR "lung disorder\*" OR "immature lung\*" OR "respiratory distress" OR "Retinopathy of prematurity" OR ROP OR sepsis OR sepsis OR septic OR septicemi\* OR septicemia\* OR infect\* OR bacteria\* OR bacteremi\* OR bacteraemi\* OR microorganism\* OR "micro-organism\*" OR "blood poisoning\*" OR pyohemi\* OR pyohaemi\* OR pyemi\* OR pyaemi\* OR ((brain OR neurologic\* OR cognitive\* OR intellectual\* OR motor OR psychomotor) W/1 development\*) OR ((infan\* OR child\*) W/1 development\*) OR neurodevelopment\* OR "neuro-development\*" OR neurocognitive\* OR "neuro-cognitive" OR neurobehavior\* OR neurobehaviour\* OR "neuro-behavior\*" OR "neuro-behaviour\*" OR neuropsycholog\* OR "neuro-psycholog\*" OR cognition OR intelligence OR "executive function")) AND ( LIMIT-TO ( DOCTYPE,"ar" ) OR LIMIT-TO ( DOCTYPE,"re" ) OR LIMIT-TO ( DOCTYPE,"ip" ) ) AND ( LIMIT-TO ( LANGUAGE,"English" ) ) AND ( EXCLUDE ( PUBYEAR,1989) OR EXCLUDE ( PUBYEAR,1988) OR EXCLUDE ( PUBYEAR,1987) OR EXCLUDE ( PUBYEAR,1986) OR EXCLUDE ( PUBYEAR,1985) OR EXCLUDE ( PUBYEAR,1984) OR EXCLUDE ( PUBYEAR,1983) OR EXCLUDE ( PUBYEAR,1982) OR EXCLUDE ( PUBYEAR,1981) OR EXCLUDE ( PUBYEAR,1980) OR EXCLUDE ( PUBYEAR,1979) OR EXCLUDE ( PUBYEAR,1978) OR EXCLUDE ( PUBYEAR,1977) OR EXCLUDE ( PUBYEAR,1976) OR EXCLUDE ( PUBYEAR,1975) OR EXCLUDE ( PUBYEAR,1974) OR EXCLUDE ( PUBYEAR,1973) OR EXCLUDE ( PUBYEAR,1972) OR EXCLUDE ( PUBYEAR,1971) OR EXCLUDE ( PUBYEAR,1970) OR EXCLUDE ( PUBYEAR,1969) OR EXCLUDE ( PUBYEAR,1968) OR EXCLUDE ( PUBYEAR,1967) OR EXCLUDE ( PUBYEAR,1966) OR EXCLUDE ( PUBYEAR,1965) OR EXCLUDE ( PUBYEAR,1964) OR EXCLUDE ( PUBYEAR,1963) OR EXCLUDE ( PUBYEAR,1959) OR EXCLUDE ( PUBYEAR,1957) OR EXCLUDE ( PUBYEAR,1954) OR EXCLUDE ( PUBYEAR,1948) OR EXCLUDE ( PUBYEAR,1946) OR EXCLUDE ( PUBYEAR,1939) )

## Cochrane Central Register of Controlled Trials (Issue 5 of 12, May 2017)

N=311

((("low birthweight" OR "low birth weight" OR VLBW OR ELBW OR Prematur\* OR Preterm OR "Pre-term") NEAR/1 (Infant\* OR Neonat\* OR newborn\* OR "new-born\*" OR baby\* OR babies)) OR "neonatal intensive care" OR NICU) AND (((breastmilk OR (human OR breast OR mother\* OR maternal OR express\* OR donor\* OR donated OR bank\*)) NEAR/2 milk\*) OR (breastfeed\* OR breastfed OR ((breast OR HM) NEAR/0 (fed OR feed\*))) OR ((EHM OR MOM OR PDM) AND milk) OR (Enteral\* NEAR/0 (nutrition\* OR support OR feed\*))) AND (((prematur\* OR preterm OR "pre-term") NEAR/1 disease\*) OR "Necrotising enterocolitis" OR "Necrotizing enterocolitis" OR NEC OR "Bronchopulmonary dysplasia" OR "broncho-pulmonary dysplasia" OR BPD OR "lung disease\*" OR "lung disorder\*" OR "immature lung\*" OR "respiratory distress" OR "Retinopathy of prematurity" OR ROP OR sepsis OR sepsis OR septic OR septicemi\* OR septicemia\* OR infect\* OR bacteria\* OR bacteremi\* OR bacteraemi\* OR microorganism\* OR "micro-organism\*" OR "blood poisoning\*" OR pyohemi\* OR pyohaemi\* OR pyemi\* OR pyaemi\* OR ((brain OR neurologic\* OR cognitive\* OR intellectual\* OR motor OR psychomotor) NEAR/1 development\*) OR ((infan\* OR child\*) NEAR/1 development\*) OR neurodevelopment\* OR "neuro-development\*" OR neurocognitive\* OR "neuro-cognitive" OR neurobehavior\* OR neurobehaviour\* OR "neuro-behavior\*" OR "neuro-behaviour\*" OR neuropsycholog\* OR "neuro-psycholog\*" OR cognition OR intelligence OR "executive function")

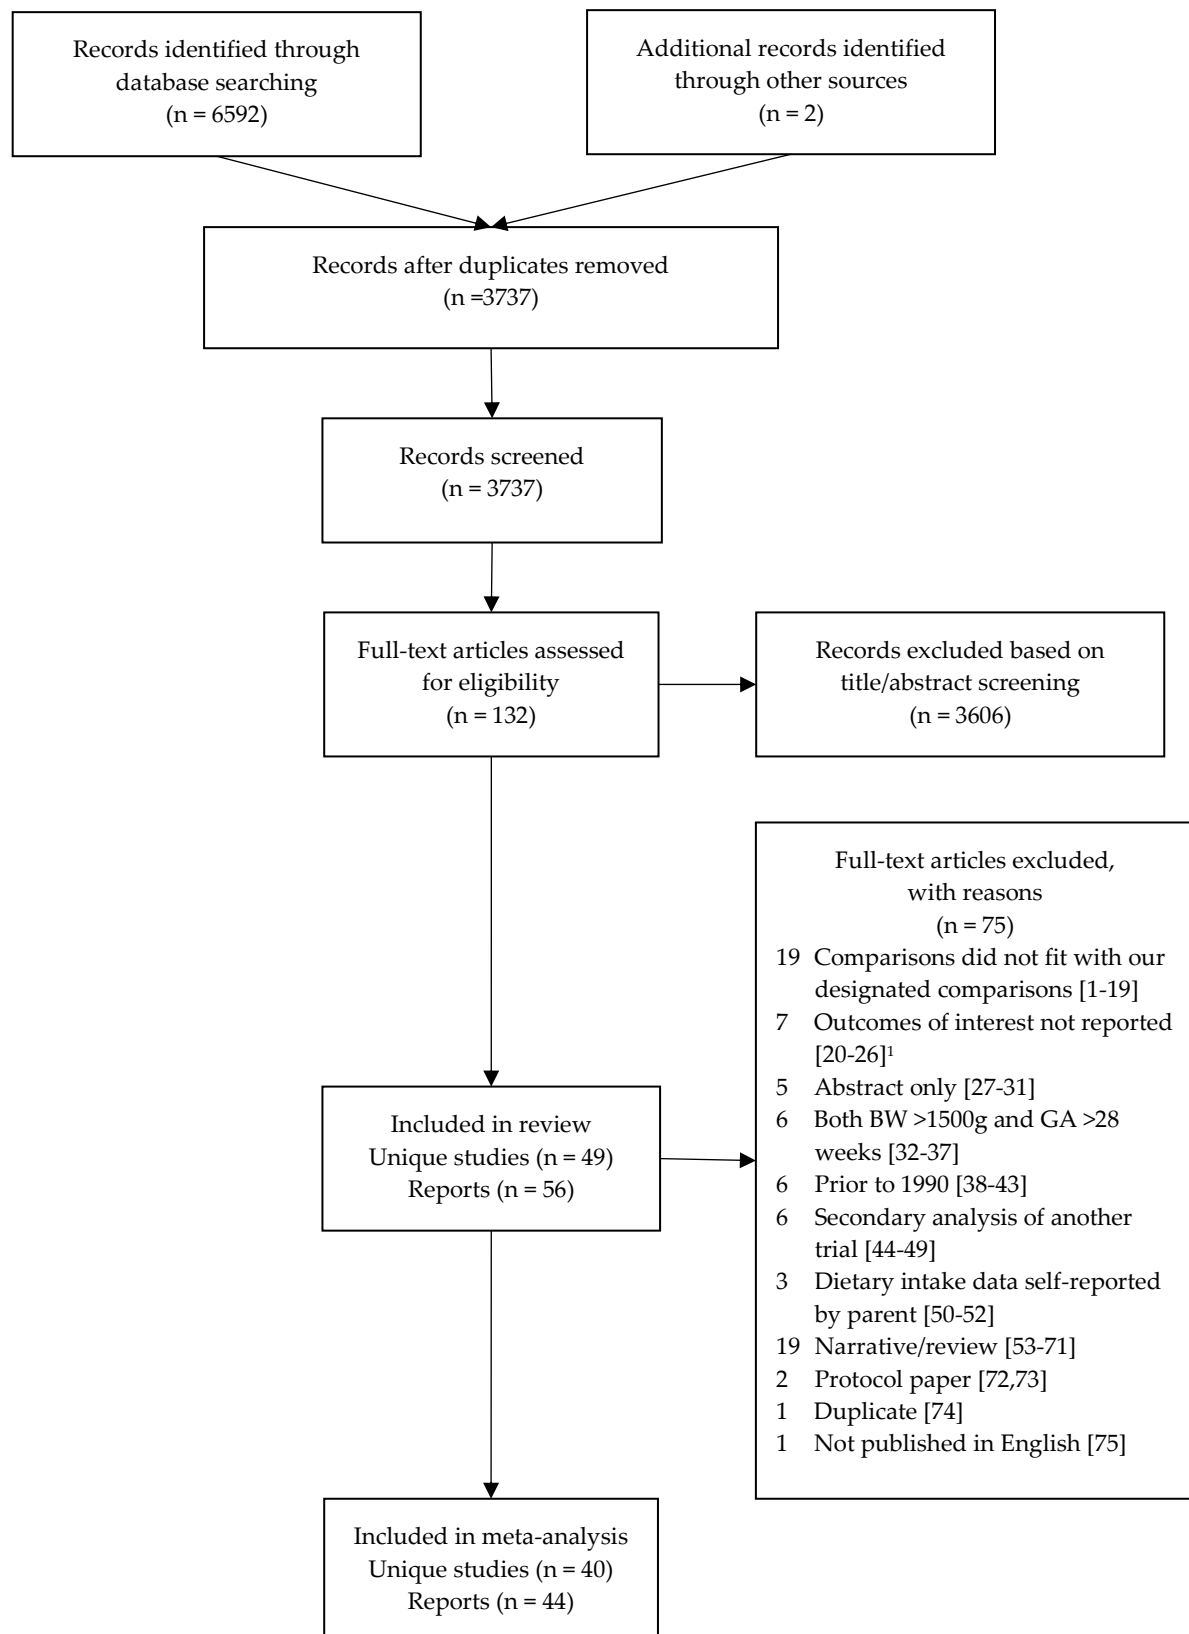

**Figure S1. PRISMA diagram - selection of studies**

<sup>1</sup> This includes one study which reported combined outcomes of interest [21]

## References - excluded studies

1. In the News - News from the National Institute of Nursing Research. Breast milk better for preemies. *Am J Nurs.* **2008**, *108*, 22.
2. Kanmaz, H.G.; Mutlu, B.; Canpolat, F.E.; Erdeve, O.; Oguz, S.S.; Uras, N.; Dilmen, U. Human milk fortification with differing amounts of fortifier and its association with growth and metabolic responses in preterm infants. *J Hum Lact* **2013**, *29*, 400-405.
3. Boo, N.Y.; Puah, C.H.; Lye, M.S. The role of expressed breastmilk and continuous positive airway pressure as predictors of survival in extremely low birthweight infants. *J. Trop. Pediatr.* **2000**, *46*, 15-20.
4. Butler, T.J.; Szekely, L.J.; Grow, J.L. A standardized nutrition approach for very low birth weight neonates improves outcomes, reduces cost and is not associated with increased rates of necrotizing enterocolitis, sepsis or mortality. *J. Perinatol.* **2013**, *33*, 851-857.
5. Chye, J.K.; Lim, C.T.; Leong, H.L.; Wong, P.K. Retinopathy of prematurity in very low birth weight infants. *Ann Acad Med Singapore* **1999**, *28*, 193-198.
6. Collins, C.T.; Gibson, R.A.; Anderson, P.J.; McPhee, A.J.; Sullivan, T.R.; Gould, J.F.; Ryan, P.; Doyle, L.W.; Davis, P.G.; McMichael, J.E., *et al.* Neurodevelopmental outcomes at 7 years' corrected age in preterm infants who were fed high-dose docosahexaenoic acid to term equivalent: A follow-up of a randomised controlled trial. *BMJ Open.* **2015**, *5*, e007314.
7. Filipouski, G.; Silveira, R.; Procianoy, R. Influence of perinatal nutrition and gestational age on neurodevelopment of very low-birth-weight preterm infants. *Am. J. Perinatol.* **2013**, *30*, 673-680.
8. Kantorowska, A.; Wei, J.C.; Cohen, R.S.; Lawrence, R.A.; Gould, J.B.; Lee, H.C. Impact of donor milk availability on breast milk use and necrotizing enterocolitis rates. *Pediatrics.* **2016**, *137*, e20153123.
9. Khorana, M.; Jiamsajamongkhon, C. Pilot study on growth parameters and nutritional biochemical markers in very low birth weight preterm infants fed human milk fortified with either human milk fortifier or post discharge formula. *J. Med. Assoc. Thailand* **2014**, *97*, S164-S175.
10. Olsen, I.E.; Richardson, D.K.; Schmid, C.H.; Ausman, L.M.; Dwyer, J.T. Intersite differences in weight growth velocity of extremely premature infants. *Pediatrics.* **2002**, *110*, 1125-1132.
11. Profit, J.; Zupancic, J.A.; Gould, J.B.; Pietz, K.; Kowalkowski, M.A.; Draper, D.; Hysong, S.J.; Petersen, L.A. Correlation of neonatal intensive care unit performance across multiple measures of quality of care. *JAMA Pediatr.* **2013**, *167*, 47-54.
12. Vohr, B.R.; Wright, L.L.; Poole, W.K.; McDonald, S.A. Neurodevelopmental outcomes of extremely low birth weight infants <32 weeks' gestation between 1993 and 1998. *Pediatrics.* **2005**, *116*, 635-643.
13. Weintraub, Z.; Carmi, N.; Elouti, H.; Rumelt, S. The association between stage 3 or higher retinopathy of prematurity and other disorders of prematurity. *Can. J. Ophthalmol.* **2011**, *46*, 419-424.
14. Arnold, L.D. The cost-effectiveness of using banked donor milk in the neonatal intensive care unit: Prevention of necrotizing enterocolitis. *J Hum Lact.* **2002**, *18*, 172-177.
15. Braga, T.D.; da Silva, G.A.P.; Lira, P.I.C.; Lima, M.C. Necrotizing enterocolitis in very low weight newborns at a high risk neonatal unit in the northeast region of Brazil (2003-2007). *Rev. Bras. Saude Matern. Infant.* **2012**, *12*, 127-133.
16. da Matta Aprile, M.; Feferbaum, R.; Andreassa, N.; Leone, C. Growth of very low birth weight infants fed with milk from a human milk bank selected according to the caloric and protein value. *Clinics.* **2010**, *65*, 751-756.
17. Hallstrom, M.; Koivisto, A.M.; Janas, M.; Tammela, O. Frequency of and risk factors for necrotizing enterocolitis in infants born before 33 weeks of gestation. *Acta Paediatr.* **2003**, *92*, 111-113.

18. Abily-Donval, L.; Pinto-Cardoso, G.; Chadie, A.; Guerrot, A.M.; Torre, S.; Rondeau, S.; Marret, S.; Perinatal Network of, H.-N. Comparison in outcomes at two-years of age of very preterm infants born in 2000, 2005 and 2010. *PLoS One*. **2015**, *10*, e0114567.
19. Beaino, G.; Khoshnood, B.; Kaminski, M.; Marret, S.; Pierrat, V.; Vieux, R.; Thiriez, G.; Matis, J.; Picaud, J.C.; Rozé, J.C., *et al.* Predictors of the risk of cognitive deficiency in very preterm infants: The epipage prospective cohort. *Acta Paediatr*. **2011**, *100*, 370-378.
20. Bigger, H.R.; Fogg, L.J.; Patel, A.; Johnson, T.; Engstrom, J.L.; Meier, P.P. Quality indicators for human milk use in very low-birthweight infants: Are we measuring what we should be measuring? *J. Perinatol*. **2014**, *34*, 287-291.
21. Corpeleijn, W.E.; Kouwenhoven, S.M.P.; Paap, M.C.; Van Vliet, I.; Scheerder, I.; Muizer, Y.; Helder, O.K.; Van Goudoever, J.B.; Vermeulen, M.J. Intake of own mother's milk during the first days of life is associated with decreased morbidity and mortality in very low birth weight infants during the first 60 days of life. *Neonatology*. **2012**, *102*, 276-281.
22. Marinelli, K.A.; Lussier, M.M.; Brownell, E.; Herson, V.C.; Hagadorn, J.I. The effect of a donor milk policy on the diet of very low birth weight infants. *J Hum Lact*. **2014**, *30*, 310-316.
23. Meinzen-Derr, J.; Poindexter, B.; Wrage, L.; Morrow, A.L.; Stoll, B.; Donovan, E.F. Role of human milk in extremely low birth weight infants' risk of necrotizing enterocolitis or death. *J. Perinatol*. **2009**, *29*, 57-62.
24. Nicholl, R.M.; Gamsu, H.R. Changes in growth and metabolism in very low birthweight infants fed with fortified breast milk. *Acta Paediatr*. **1999**, *88*, 1056-1061.
25. Amin, S.B.; Merle, K.S.; Orlando, M.S.; Dalzell, L.E.; Guillet, R. Brainstem maturation in premature infants as a function of enteral feeding type. *Pediatrics*. **2000**, *106*, 318-322.
26. Chan, G.M.; Borschel, M.W.; Jacobs, J.R. Effects of human milk or formula feeding on the growth, behavior, and protein status of preterm infants discharged from the newborn intensive care unit. *Am J Clin Nutr*. **1994**, *60*, 710-716.
27. Ganapathy, V.; Hay, J.W.; Kim, J. Analysis of necrotizing enterocolitis costs among extremely preterm infants fed exclusively human-milk based diet vs. Human-milk fortified with bovine-milk based supplements. *Value Health*. **2010**, *13*, A183-A184.
28. Ganapathy, V.; Hay, J.W.; Kim, J.H. Costs of necrotizing enterocolitis and cost-effectiveness of exclusively human milk-based products in feeding extremely premature infants. *Breastfeeding Med*. **2012**, *7*, 29-37.
29. Manzoni, P.; Lista, G.; Messner, H.; Cattani, S.; Rinaldi, M.; Pugni, L.; Decembrino, L.; Stolfi, I.; Gallo, E.; Stronati, M., *et al.* Fresh maternal milk feeding prevents retinopathy of prematurity: Data from two multicenter, randomized, placebo-controlled trials in preterm VLBW neonates in NICU. **2009**, Pediatric Academic Societies annual congress *abstract*.
30. Paolo, M. Fresh maternal milk feeding prevents retinopathy of prematurity: Data from two multicenter, randomized, placebo-controlled trials in preterm VLBW neonates in NICU. **2008**, Pediatric Academic Societies annual congress *abstract*.
31. Cocskun, Y.; Dalkan, C.; Yabas, O.; Demirel, O.; Bayar, E.; Sakarya, S.; Muftuotlu, T.; Ersanli, D.; Akman, I. The risk of retinopathy of prematurity (ROP) and comparing series IGF1 levels and clinical score system. *J. Matern. Fetal. Neonatal. Med*. **2016**, *29*, S1,doi:10.1080/14767058.2016.1191212
32. Drane, D.L.; Logemann, J.A. A critical evaluation of the evidence on the association between type of infant feeding and cognitive development. *Paediatr. Perinat. Epidemiol*. **2000**, *14*, 349-356.
33. Dritsakou, K.; Liosis, G.; Valsami, G.; Polychronopoulos, E.; Skouroliaou, M. Improved outcomes of feeding low birth weight infants with predominantly raw human milk versus donor banked milk and formula. *J. Matern.-Fetal Neonatal Med*. **2016**, *29*, 1131-1138.
34. Dritsakou, K.; Liosis, G.; Valsami, G.; Polychronopoulos, E.; Souliotis, K.; Skouroliaou, M. Mother's breast milk supplemented with donor milk reduces hospital and health service usage costs in low-birthweight infants. *Midwifery*. **2016**, *40*, 109-113.

35. el-Mohandes, A.E.; Picard, M.B.; Simmens, S.J.; Keiser, J.F. Use of human milk in the intensive care nursery decreases the incidence of nosocomial sepsis. *J Perinatol.* **1997**, *17*, 130-134.
36. Morley, R.; Fewtrell, M.S.; Abbott, R.A.; Stephenson, T.; MacFadyen, U.; Lucas, A. Neurodevelopment in children born small for gestational age: A randomized trial of nutrient-enriched versus standard formula and comparison with a reference breastfed group. *Pediatrics.* **2004**, *113*, 515-521.
37. Hoque, M.M.; Ahmed, N.U.; Khan, F.H.; Jahan, R.; Yasmeen, H.N.; Chowdhury, M.A. Breastfeeding and cognitive development of children: Assessment at one year of age. *Mymensingh. Med. J.* **2012**, *21*, 316-321.
38. Morley, R.; Lucas, A. Randomized diet in the neonatal period and growth performance until 7.5- 8 y of age in preterm children. *Am. J. Clin. Nutr.* **2000**, *71*, 822-828.
39. Morley, R. Breast feeding and cognitive outcome in children born prematurely. *Adv. Exp. Med. Biol.* **2002**, *503*, 77-82.
40. Boyd, C.A.; Quigley, M.A.; Brocklehurst, P. Donor breast milk versus infant formula for preterm infants: Systematic review and meta-analysis. *Arch. Dis. Child. Fetal Neonatal Ed.* **2007**, *92*, F169-F175.
41. Elgen, I.; Sommerfelt, K.; Ellertsen, B. Cognitive performance in a low birth weight cohort at 5 and 11 years of age. *Pediatr. Neurol.* **2003**, *29*, 111-116.
42. Anderson, J.W.; Johnstone, B.M.; Remley, D.T. Breast-feeding and cognitive development: A meta-analysis. *Am. J. Clin. Nutr.* **1999**, *70*, 525-535.
43. Lucas, A.; Morley, R.; Cole, T.J.; Gore, S.M. A randomised multicentre study of human milk versus formula and later development in preterm infants. *Arch. Dis. Child. Fetal Neonatal Ed.* **1994**, *70*, F141-146.
44. Colaizy, T.T.; Bartick, M.C.; Jegier, B.J.; Green, B.D.; Reinhold, A.G.; Schaefer, A.J.; Bogen, D.L.; Schwarz, E.B.; Stuebe, A.M.; Eunice Kennedy Shriver National Institute of Child, H., *et al.* Impact of optimized breastfeeding on the costs of necrotizing enterocolitis in extremely low birthweight infants. *J. Pediatr.* **2016**, *175*, 100-105.e2.
45. Mahon, J.; Claxton, L.; Wood, H. Modelling the cost-effectiveness of human milk and breastfeeding in preterm infants in the united kingdom. *Health Econ. Rev.* **2016**, *6*, 54.
46. Abrams, S.A.; Schanler, R.J.; Lee, M.L.; Rechtman, D.J. Greater mortality and morbidity in extremely preterm infants fed a diet containing cow milk protein products. *Breastfeed. Med.* **2014**, *9*, 281-285.
47. Fang, J.L.; Sorita, A.; Carey, W.A.; Colby, C.E.; Hassan Murad, M.; Alahdab, F. Interventions to prevent retinopathy of prematurity: A meta-analysis. *Pediatrics.* **2016**, 137.
48. McGuire, W.; Anthony, M.Y. Donor human milk versus formula for preventing necrotising enterocolitis in preterm infants: Systematic review. *Arch. Dis. Child. Fetal Neonatal Ed.* **2003**, *88*, F11-F14.
49. Sisk, P.M.; Lovelady, C.A.; Gruber, K.J.; Dillard, R.G.; O'Shea, T.M. Human milk consumption and full enteral feeding among infants who weigh  $\leq$  1250 grams. *Pediatrics.* **2008**, *121*, e1528-1533.
50. Smith, M.M.; Durkin, M.; Hinton, V.J.; Bellinger, D.; Kuhn, L. Influence of breastfeeding on cognitive outcomes at age 6-8 years: Follow-up of very low birth weight infants. *Am. J. Epidemiol.* **2003**, *158*, 1075-1082.
51. Gibertoni, D.; Corvaglia, L.; Vandini, S.; Rucci, P.; Savini, S.; Alessandroni, R.; Sansavini, A.; Fantini, M.P.; Faldella, G. Positive effect of human milk feeding during NICU hospitalization on 24 month neurodevelopment of very low birth weight infants: An italian cohort study. *PLoS ONE* **2015**, *10*, e0116552.
52. Roze, J.C.; Darmaun, D.; Boquien, C.Y.; Flamant, C.; Picaud, J.C.; Savagner, C.; Claris, O.; Lapillonne, A.; Mitanchez, D.; Branger, B., *et al.* The apparent breastfeeding paradox in very preterm infants: Relationship between breast feeding, early weight gain and

- neurodevelopment based on results from two cohorts, epipage and lift. *BMJ Open* **2012**, 2, e000834.
53. Adamkin, D.H. Mother's milk, feeding strategies, and lactoferrin to prevent necrotizing enterocolitis. *JPEN J. Parenter. Enteral Nutr.* **2012**, 36, 25S-29S.
54. Behrman, D.; Broadfoot, M.; Buchanan, P.; Lamont, C.; Sachs, M. Early diet in preterm babies and later intelligence quotient. Surely study showed that breast milk is feed of choice for premature babies. *BMJ*. **1999**, 318, 1625.
55. Chapman, D.J. Human milk dose in the first month is inversely associated with sepsis and nicu costs. *J. Hum. Lact.* **2013**, 29, 339-340.
56. Rey, J. Breastfeeding and cognitive development. *Acta Paediatr.* **2003**, 92, S11-S18.
57. Furman, L. Yes, human milk does reduce infection rates in very low birthweight infants. *Arch Dis Child Fetal Neonatal Ed.* **2006**, 91, F78.
58. Raghuveer, T.S.; Belmont, J.M. Human milk intake and retinopathy of prematurity in extremely low birth weight infants. *Pediatrics*. **2008**, 122, 686-687.
59. Verd, S.; Ginovart, G. Weight gain and bronchopulmonary dysplasia in human milk fed preterm infants. *J. Pediatr.* **2016**, 173, 267.
60. Wight, N.E. Donor human milk versus formula for preventing necrotising enterocolitis in preterm infants: Systematic review. *J. Pediatr.* **2003**, 143, 137-138.
61. Henderson, G.; Anthony, M.Y.; McGuire, W. Formula milk versus maternal breast milk for feeding preterm or low birth weight infants. *Cochrane Database Syst. Rev.* **2007**. 10.1002/14651858.CD002972.pub2
62. Bharwani, S.K.; Green, B.F.; Pezzullo, J.C.; Bharwani, S.S.; Bharwani, S.S.; Dhanireddy, R. Systematic review and meta-analysis of human milk intake and retinopathy of prematurity: A significant update. *J. Perinatol.* **2016**, 36, 913-920.
63. Cacho, N.T.; Parker, L.A.; Neu, J. Necrotizing enterocolitis and human milk feeding: A systematic review. *Clin. Perinatol.* **2017**, 44, 49-67.
64. De Silva, A.; Jones, P.W.; Spencer, S.A. Does human milk reduce infection rates in preterm infants? A systematic review. *Arch. Dis. Child. Fetal Neonatal Ed.* **2004**, 89, F509-F513.
65. Koo, W.; Tank, S.; Martin, S.; Shi, R. Human milk and neurodevelopment in children with very low birth weight: A systematic review. *Nutr. J.* **2014**, 13.
66. Lechner, B.E.; Vohr, B.R. Neurodevelopmental outcomes of preterm infants fed human milk: A systematic review. *Clin. Perinatol.* **2017**, 44, 69-83.
67. Zhou, J.; Shukla, V.V.; John, D.; Chen, C. Human milk feeding as a protective factor for retinopathy of prematurity: A meta-analysis. *Pediatrics* **2015**, 136, e1576-e1586.
68. Quigley, M.; McGuire, W. Formula versus donor breast milk for feeding preterm or low birth weight infants. *Cochrane Database Syst. Rev.* **2014**, Issue 4. Art. No.: CD002971. DOI: 10.1002/14651858.CD002971.pub3.
69. Johnson, T.J.; Patel, A.L.; Bigger, H.R.; Engstrom, J.L.; Meier, P.P. Economic benefits and costs of human milk feedings: A strategy to reduce the risk of prematurity-related morbidities in very-low-birth-weight infants. *Adv Nutr Res* **2014**, 5, 207-212.
70. DiBiasie, A. Evidence-based review of retinopathy of prematurity prevention in vlbw and elbw infants. *Neonatal Netw.* **2006**, 25, 393-403.
71. Kosloske, A.M. Breast milk decreases the risk of neonatal necrotizing enterocolitis. *Adv Nutr Res* **2001**, 10, 123-137.
72. Collins, C.T.; Gibson, R.A.; Makrides, M.; McPhee, A.J.; Sullivan, T.R.; Davis, P.G.; Thio, M.; Simmer, K.; Rajadurai, V.S. The N3RO trial: A randomised controlled trial of docosahexaenoic acid to reduce bronchopulmonary dysplasia in preterm infants < 29 weeks' gestation. *BMC Pediatr.* **2016**, 16, 72.
73. Unger, S.; Gibbins, S.; Zupancic, J.; O'Connor, D.L. Domino: Donor milk for improved neurodevelopmental outcomes. *BMC Pediatr.* **2014**, 14.

74. Quigley, M.A.; Henderson, G.; Anthony, M.Y.; McGuire, W. Formula milk versus donor breast milk for feeding preterm or low birth weight infants. *Cochrane Database Syst Rev* **2007**.
75. Sánchez-Tamayo, T.; Espinosa Fernández, M.G.; Affumicato, L.; González López, M.; Fernández Romero, V.; Moreno Algarra, M.C.; Salguero García, E. Reduction in necrotising enterocolitis after implementing an evidence-based enteral nutrition protocol in very low birth weight newborns. *An. Pediatr.* **2016**, *85*, 291-299.

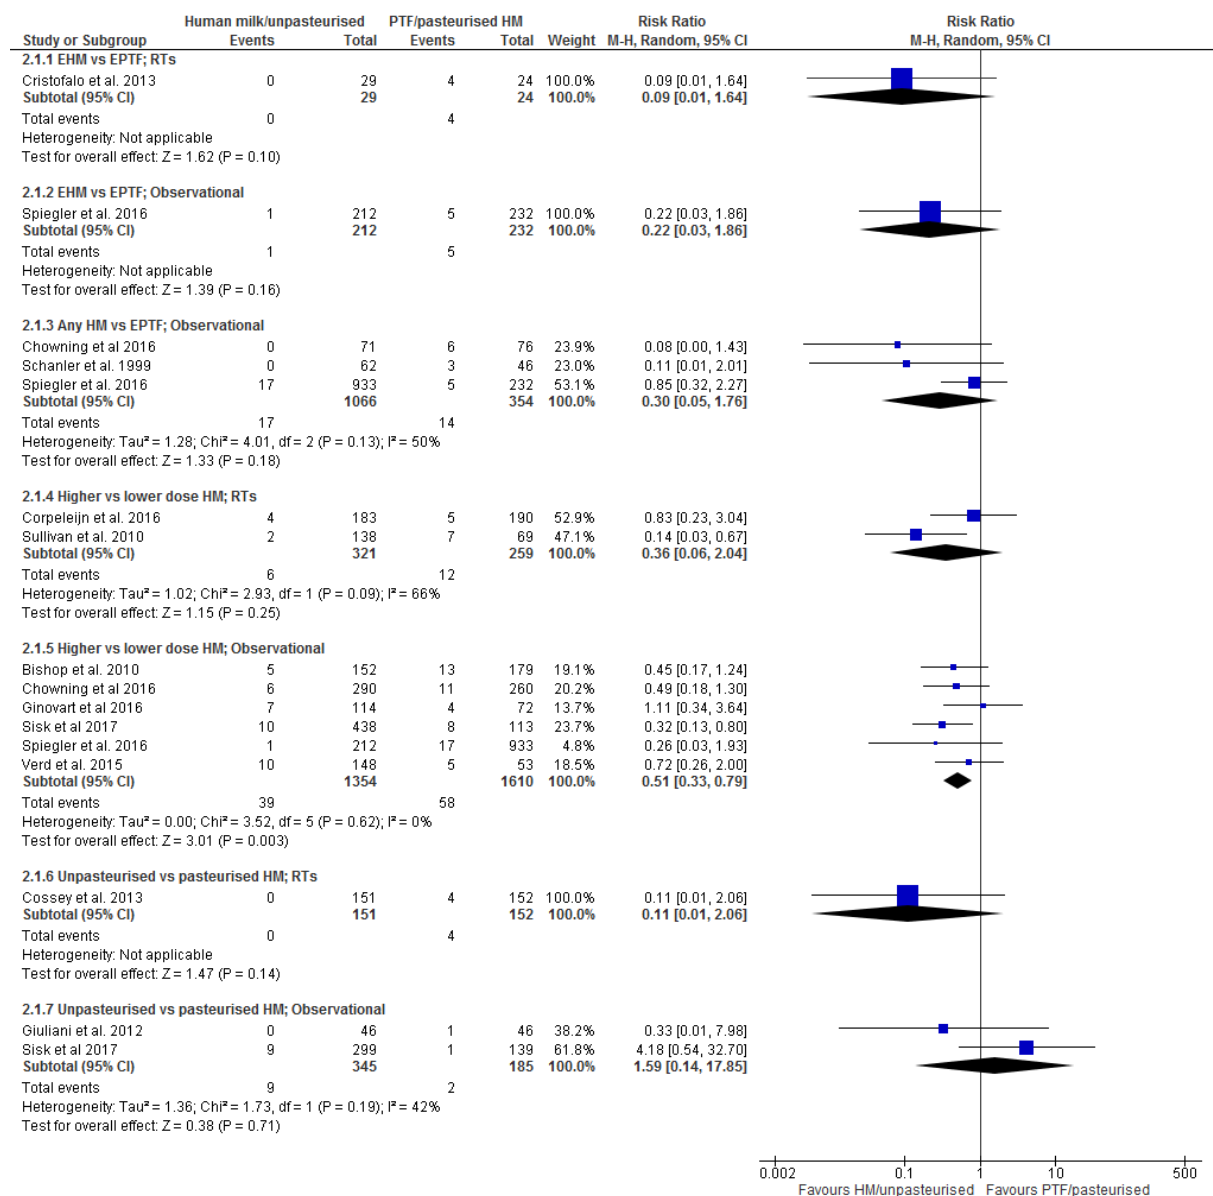

Figure S2. Forest plot of relative risk for the association of human milk and severe necrotising enterocolitis

Table S3. Any necrotising enterocolitis: summary of findings

| Comparisons                                                                                                                                                                                                | Anticipated absolute effects* (95% CI)            |                                                | Relative effect (95% CI) | № of participants (studies)     | Certainty of the evidence (GRADE) |
|------------------------------------------------------------------------------------------------------------------------------------------------------------------------------------------------------------|---------------------------------------------------|------------------------------------------------|--------------------------|---------------------------------|-----------------------------------|
|                                                                                                                                                                                                            | Risk with preterm formula/ pasteurised human milk | Risk with human milk/ unpasteurised human milk |                          |                                 |                                   |
| Necrotising enterocolitis - Exclusive human milk vs exclusive preterm formula; RTs                                                                                                                         | Study population                                  |                                                | RR 0.17 (0.02 to 1.32)   | 53 (1 RCT)                      | ⊕⊕⊕⊖ LOW <sup>1</sup>             |
|                                                                                                                                                                                                            | 208 per 1,000                                     | 35 per 1,000 (4 to 275)                        |                          |                                 |                                   |
| Necrotising enterocolitis - Exclusive human milk vs exclusive preterm formula; Non-RT & Observational                                                                                                      | Study population                                  |                                                | RR 0.22 (0.09 to 0.54)   | 993 (3 observational studies)   | ⊕⊕⊕⊖ MODERATE                     |
|                                                                                                                                                                                                            | 55 per 1,000                                      | 12 per 1,000 (5 to 30)                         |                          |                                 |                                   |
| Necrotising enterocolitis - Any human milk vs exclusive preterm formula; Observational                                                                                                                     | Study population                                  |                                                | RR 0.51 (0.35 to 0.76)   | 3783 (9 observational studies)  | ⊕⊕⊕⊖ MODERATE                     |
|                                                                                                                                                                                                            | 73 per 1,000                                      | 37 per 1,000 (26 to 56)                        |                          |                                 |                                   |
| Necrotising enterocolitis - Higher vs lower dose human milk intake; RTs                                                                                                                                    | Study population                                  |                                                | RR 0.54 (0.28 to 1.02)   | 1116 (4 RCTs)                   | ⊕⊕⊕⊖ MODERATE <sup>2,3</sup>      |
|                                                                                                                                                                                                            | 94 per 1,000                                      | 51 per 1,000 (26 to 96)                        |                          |                                 |                                   |
| Necrotising enterocolitis - Higher vs lower dose human milk intake; Observational                                                                                                                          | Study population                                  |                                                | RR 0.53 (0.42 to 0.67)   | 8778 (22 observational studies) | ⊕⊕⊕⊖ MODERATE                     |
|                                                                                                                                                                                                            | 80 per 1,000                                      | 42 per 1,000 (34 to 54)                        |                          |                                 |                                   |
| Necrotising enterocolitis - Unpasteurised vs pasteurised human milk (MOM or donor); RTs                                                                                                                    | Study population                                  |                                                | RR 1.45 (0.64 to 3.30)   | 303 (1 RCT)                     | ⊕⊕⊕⊖ LOW <sup>4</sup>             |
|                                                                                                                                                                                                            | 59 per 1,000                                      | 86 per 1,000 (38 to 195)                       |                          |                                 |                                   |
| Necrotising enterocolitis - Unpasteurised vs pasteurised human milk (MOM or donor); Observational                                                                                                          | Study population                                  |                                                | RR 1.28 (0.68 to 2.43)   | 1894 (6 observational studies)  | ⊕⊕⊕⊖ VERY LOW <sup>5</sup>        |
|                                                                                                                                                                                                            | 37 per 1,000                                      | 47 per 1,000 (25 to 90)                        |                          |                                 |                                   |
| *The risk in the intervention group (and its 95% confidence interval) is based on the assumed risk in the comparison group and the relative effect of the intervention (and its 95% CI).                   |                                                   |                                                |                          |                                 |                                   |
| CI: Confidence interval; RR: Risk ratio; OR: Odds ratio; RT: Randomised Trial                                                                                                                              |                                                   |                                                |                          |                                 |                                   |
| GRADE Working Group grades of evidence                                                                                                                                                                     |                                                   |                                                |                          |                                 |                                   |
| High certainty: We are very confident that the true effect lies close to that of the estimate of the effect                                                                                                |                                                   |                                                |                          |                                 |                                   |
| Moderate certainty: We are moderately confident in the effect estimate: The true effect is likely to be close to the estimate of the effect, but there is a possibility that it is substantially different |                                                   |                                                |                          |                                 |                                   |
| Low certainty: Our confidence in the effect estimate is limited: The true effect may be substantially different from the estimate of the effect                                                            |                                                   |                                                |                          |                                 |                                   |
| Very low certainty: We have very little confidence in the effect estimate: The true effect is likely to be substantially different from the estimate of effect                                             |                                                   |                                                |                          |                                 |                                   |

**Footnotes:** <sup>1</sup>1 study, wide CIs, small sample size; <sup>2</sup>Sullivan was not blinded, however, the outcome is objective and unlikely to be biased by this, hence not downgraded;

<sup>3</sup>Moderate heterogeneity; <sup>4</sup>1 study, wide CIs; <sup>5</sup>Wide CIs

Table S4. Severe necrotising enterocolitis: summary of findings

| Comparisons                                                                                                                                                                                                | Anticipated absolute effects* (95% CI)            |                                                | Relative effect (95% CI) | № of participants (studies) | Certainty of the evidence (GRADE) |
|------------------------------------------------------------------------------------------------------------------------------------------------------------------------------------------------------------|---------------------------------------------------|------------------------------------------------|--------------------------|-----------------------------|-----------------------------------|
|                                                                                                                                                                                                            | Risk with preterm formula/ pasteurised human milk | Risk with human milk/ unpasteurised human milk |                          |                             |                                   |
| NEC surgery - EHM vs EPTF; RTs                                                                                                                                                                             | Study population                                  |                                                | RR 0.09                  | 53                          | ⊕⊕⊕⊕                              |
|                                                                                                                                                                                                            | 167 per 1,000                                     | 15 per 1,000 (2 to 273)                        | (0.01 to 1.64)           | (1 RT)                      | LOW <sup>1</sup>                  |
| NEC surgery - EHM vs EPTF; Observational                                                                                                                                                                   | Study population                                  |                                                | RR 0.22                  | 444                         | ⊕⊕⊕⊕                              |
|                                                                                                                                                                                                            | 22 per 1,000                                      | 5 per 1,000 (1 to 40)                          | (0.03 to 1.86)           | (1 observational study)     | VERY LOW <sup>1</sup>             |
| NEC surgery - Any HM vs EPTF; Observational                                                                                                                                                                | Study population                                  |                                                | RR 0.30                  | 1420                        | ⊕⊕⊕⊕                              |
|                                                                                                                                                                                                            | 40 per 1,000                                      | 12 per 1,000 (2 to 70)                         | (0.05 to 1.76)           | (3 observational studies)   | VERY LOW <sup>2</sup>             |
| NEC surgery - Higher vs lower dose HM; RTs                                                                                                                                                                 | Study population                                  |                                                | RR 0.36                  | 580                         | ⊕⊕⊕⊕                              |
|                                                                                                                                                                                                            | 46 per 1,000                                      | 17 per 1,000 (3 to 95)                         | (0.06 to 2.04)           | (2 RCTs)                    | LOW <sup>2,3</sup>                |
| NEC surgery - Higher vs lower dose HM; Observational                                                                                                                                                       | Study population                                  |                                                | RR 0.51                  | 2964                        | ⊕⊕⊕⊕                              |
|                                                                                                                                                                                                            | 36 per 1,000                                      | 18 per 1,000 (12 to 28)                        | (0.33 to 0.79)           | (6 observational studies)   | MODERATE                          |
| NEC surgery - Unpasteurised vs pasteurised HM; RTs                                                                                                                                                         | Study population                                  |                                                | RR 0.11                  | 303                         | ⊕⊕⊕⊕                              |
|                                                                                                                                                                                                            | 26 per 1,000                                      | 3 per 1,000 (0 to 54)                          | (0.01 to 2.06)           | (1 RCT)                     | LOW <sup>1</sup>                  |
| NEC surgery - Unpasteurised vs pasteurised HM; Observational                                                                                                                                               | Study population                                  |                                                | RR 1.59                  | 530                         | ⊕⊕⊕⊕                              |
|                                                                                                                                                                                                            | 11 per 1,000                                      | 17 per 1,000 (2 to 193)                        | (0.14 to 17.85)          | (2 observational studies)   | VERY LOW <sup>3</sup>             |
| *The risk in the intervention group (and its 95% confidence interval) is based on the assumed risk in the comparison group and the relative effect of the intervention (and its 95% CI).                   |                                                   |                                                |                          |                             |                                   |
| CI: Confidence interval; RR: Risk ratio; OR: Odds ratio;                                                                                                                                                   |                                                   |                                                |                          |                             |                                   |
| GRADE Working Group grades of evidence                                                                                                                                                                     |                                                   |                                                |                          |                             |                                   |
| High certainty: We are very confident that the true effect lies close to that of the estimate of the effect                                                                                                |                                                   |                                                |                          |                             |                                   |
| Moderate certainty: We are moderately confident in the effect estimate: The true effect is likely to be close to the estimate of the effect, but there is a possibility that it is substantially different |                                                   |                                                |                          |                             |                                   |
| Low certainty: Our confidence in the effect estimate is limited: The true effect may be substantially different from the estimate of the effect                                                            |                                                   |                                                |                          |                             |                                   |
| Very low certainty: We have very little confidence in the effect estimate: The true effect is likely to be substantially different from the estimate of effect                                             |                                                   |                                                |                          |                             |                                   |

**Footnotes:** <sup>1</sup>Single study, wide CIs; <sup>2</sup>Moderate heterogeneity; <sup>3</sup>Wide CI

Table S5. Late onset sepsis: summary of findings

| Comparisons                                                                                                                                                                                                | Anticipated absolute effects* (95% CI)            |                                                | Relative effect (95% CI) | № of participants (studies) | Certainty of the evidence (GRADE) |
|------------------------------------------------------------------------------------------------------------------------------------------------------------------------------------------------------------|---------------------------------------------------|------------------------------------------------|--------------------------|-----------------------------|-----------------------------------|
|                                                                                                                                                                                                            | Risk with preterm formula/ pasteurised human milk | Risk with human milk/ unpasteurised human milk |                          |                             |                                   |
| Late onset sepsis - Exclusive human milk vs exclusive preterm formula: RT                                                                                                                                  | Study population                                  |                                                | RR 0.70                  | 53                          | ⊕⊕⊕⊕                              |
|                                                                                                                                                                                                            | 792 per 1,000                                     | 554 per 1,000 (372 to 815)                     | (0.47 to 1.03)           | (1 RCT)                     | LOW <sup>1</sup>                  |
| Late onset sepsis - Exclusive human milk vs exclusive preterm formula; Non-RT and Observational                                                                                                            | Study population                                  |                                                | RR 0.71                  | 776                         | ⊕⊕⊕⊕                              |
|                                                                                                                                                                                                            | 174 per 1,000                                     | 123 per 1,000 (85 to 183)                      | (0.49 to 1.05)           | (3 observational studies)   | LOW                               |
| Late onset sepsis - Any human milk vs exclusive preterm formula; Observational                                                                                                                             | Study population                                  |                                                | RR 0.95                  | 2497                        | ⊕⊕⊕⊕                              |
|                                                                                                                                                                                                            | 301 per 1,000                                     | 286 per 1,000 (202 to 404)                     | (0.67 to 1.34)           | (8 observational studies)   | VERY LOW <sup>2,3</sup>           |
| Late onset sepsis - Higher vs lower dose human milk intake; RTs                                                                                                                                            | Study population                                  |                                                | RR 1.07                  | 1186                        | ⊕⊕⊕⊕                              |
|                                                                                                                                                                                                            | 276 per 1,000                                     | 295 per 1,000 (245 to 353)                     | (0.89 to 1.28)           | (4 RCTs)                    | MODERATE <sup>3</sup>             |
| Late onset sepsis - Higher vs lower dose human milk intake; Observational                                                                                                                                  | Study population                                  |                                                | RR 0.71                  | 6521                        | ⊕⊕⊕⊕                              |
|                                                                                                                                                                                                            | 230 per 1,000                                     | 163 per 1,000 (129 to 207)                     | (0.56 to 0.90)           | (18 observational studies)  | VERY LOW <sup>2</sup>             |
| Late onset sepsis - Unpasteurised vs pasteurised human milk (MOM or donor); RT                                                                                                                             | Study population                                  |                                                | RR 0.71                  | 303                         | ⊕⊕⊕⊕                              |
|                                                                                                                                                                                                            | 204 per 1,000                                     | 145 per 1,000 (88 to 241)                      | (0.43 to 1.18)           | (1 RCT)                     | MODERATE <sup>4</sup>             |
| Late onset sepsis - Unpasteurised vs pasteurised human milk (MOM or donor); Observational                                                                                                                  | Study population                                  |                                                | RR 1.05                  | 1875                        | ⊕⊕⊕⊕                              |
|                                                                                                                                                                                                            | 258 per 1,000                                     | 271 per 1,000 (222 to 328)                     | (0.86 to 1.27)           | (5 observational studies)   | VERY LOW <sup>5</sup>             |
| *The risk in the intervention group (and its 95% confidence interval) is based on the assumed risk in the comparison group and the relative effect of the intervention (and its 95% CI).                   |                                                   |                                                |                          |                             |                                   |
| CI: Confidence interval; RR: Risk ratio; OR: Odds ratio;                                                                                                                                                   |                                                   |                                                |                          |                             |                                   |
| GRADE Working Group grades of evidence                                                                                                                                                                     |                                                   |                                                |                          |                             |                                   |
| High certainty: We are very confident that the true effect lies close to that of the estimate of the effect                                                                                                |                                                   |                                                |                          |                             |                                   |
| Moderate certainty: We are moderately confident in the effect estimate: The true effect is likely to be close to the estimate of the effect, but there is a possibility that it is substantially different |                                                   |                                                |                          |                             |                                   |
| Low certainty: Our confidence in the effect estimate is limited: The true effect may be substantially different from the estimate of the effect                                                            |                                                   |                                                |                          |                             |                                   |
| Very low certainty: We have very little confidence in the effect estimate: The true effect is likely to be substantially different from the estimate of effect                                             |                                                   |                                                |                          |                             |                                   |

**Footnotes:** <sup>1</sup>Only 1 study, wide CIs; <sup>2</sup>Substantial heterogeneity; <sup>3</sup>Wide CI; <sup>4</sup>1 study only; <sup>5</sup>Moderate heterogeneity

Table S6. Bronchopulmonary dysplasia: summary of findings

| Comparisons                                                                                                                                                                                                | Anticipated absolute effects* (95% CI)            |                                                | Relative effect (95% CI) | № of participants (studies)     | Certainty of the evidence (GRADE) |
|------------------------------------------------------------------------------------------------------------------------------------------------------------------------------------------------------------|---------------------------------------------------|------------------------------------------------|--------------------------|---------------------------------|-----------------------------------|
|                                                                                                                                                                                                            | Risk with preterm formula/ pasteurised human milk | Risk with human milk/ unpasteurised human milk |                          |                                 |                                   |
| Bronchopulmonary dysplasia - Exclusive human milk vs exclusive preterm formula: Observational                                                                                                              | Study population                                  |                                                | RR 0.94 (0.26 to 3.41)   | 706 (2 observational studies)   | ⊕⊕⊕⊕<br>VERY LOW <sup>1,2</sup>   |
|                                                                                                                                                                                                            | 197 per 1,000                                     | 185 per 1,000 (51 to 672)                      |                          |                                 |                                   |
| Bronchopulmonary dysplasia - Any human milk vs exclusive preterm formula; Observational                                                                                                                    | Study population                                  |                                                | RR 1.02 (0.83 to 1.27)   | 3703 (6 observational studies)  | ⊕⊕⊕⊕<br>VERY LOW <sup>2,3</sup>   |
|                                                                                                                                                                                                            | 345 per 1,000                                     | 352 per 1,000 (286 to 438)                     |                          |                                 |                                   |
| Bronchopulmonary dysplasia - Higher vs lower dose human milk intake: RTs                                                                                                                                   | Study population                                  |                                                | RR 0.95 (0.73 to 1.25)   | 1075 (4 RCTs)                   | ⊕⊕⊕⊕<br>LOW <sup>2,3</sup>        |
|                                                                                                                                                                                                            | 263 per 1,000                                     | 250 per 1,000 (192 to 328)                     |                          |                                 |                                   |
| Bronchopulmonary dysplasia - Higher vs lower dose human milk intake; Observational                                                                                                                         | Study population                                  |                                                | RR 0.84 (0.73 to 0.96)   | 7023 (18 observational studies) | ⊕⊕⊕⊕<br>VERY LOW <sup>3</sup>     |
|                                                                                                                                                                                                            | 305 per 1,000                                     | 256 per 1,000 (223 to 293)                     |                          |                                 |                                   |
| Bronchopulmonary dysplasia - Unpasteurised vs pasteurised human milk (MOM or donor); RTs                                                                                                                   | Study population                                  |                                                | RR 0.69 (0.43 to 1.10)   | 303 (1 RCT)                     | ⊕⊕⊕⊕<br>LOW <sup>4</sup>          |
|                                                                                                                                                                                                            | 230 per 1,000                                     | 159 per 1,000 (99 to 253)                      |                          |                                 |                                   |
| Bronchopulmonary dysplasia - Unpasteurised vs pasteurised human milk (MOM or donor); Observational                                                                                                         | Study population                                  |                                                | RR 1.01 (0.72 to 1.43)   | 1644 (5 observational studies)  | ⊕⊕⊕⊕<br>VERY LOW <sup>2</sup>     |
|                                                                                                                                                                                                            | 203 per 1,000                                     | 205 per 1,000 (146 to 290)                     |                          |                                 |                                   |
| *The risk in the intervention group (and its 95% confidence interval) is based on the assumed risk in the comparison group and the relative effect of the intervention (and its 95% CI).                   |                                                   |                                                |                          |                                 |                                   |
| CI: Confidence interval; RR: Risk ratio; OR: Odds ratio;                                                                                                                                                   |                                                   |                                                |                          |                                 |                                   |
| GRADE Working Group grades of evidence                                                                                                                                                                     |                                                   |                                                |                          |                                 |                                   |
| High certainty: We are very confident that the true effect lies close to that of the estimate of the effect                                                                                                |                                                   |                                                |                          |                                 |                                   |
| Moderate certainty: We are moderately confident in the effect estimate: The true effect is likely to be close to the estimate of the effect, but there is a possibility that it is substantially different |                                                   |                                                |                          |                                 |                                   |
| Low certainty: Our confidence in the effect estimate is limited: The true effect may be substantially different from the estimate of the effect                                                            |                                                   |                                                |                          |                                 |                                   |
| Very low certainty: We have very little confidence in the effect estimate: The true effect is likely to be substantially different from the estimate of effect                                             |                                                   |                                                |                          |                                 |                                   |

**Footnotes:** <sup>1</sup>Substantial heterogeneity; <sup>2</sup>Wide CI; <sup>3</sup>Moderate heterogeneity; <sup>4</sup>Only 1 study, wide CI

Table S7. Retinopathy of prematurity: summary of findings

| Comparison                                                                                                                                                                                                 | Anticipated absolute effects* (95% CI)            |                                                | Relative effect (95% CI) | № of participants (studies)     | Certainty of the evidence (GRADE) |
|------------------------------------------------------------------------------------------------------------------------------------------------------------------------------------------------------------|---------------------------------------------------|------------------------------------------------|--------------------------|---------------------------------|-----------------------------------|
|                                                                                                                                                                                                            | Risk with preterm formula/ pasteurised human milk | Risk with human milk/ Unpasteurised human milk |                          |                                 |                                   |
| Retinopathy of prematurity - Exclusive human milk vs exclusive preterm formula; RTs                                                                                                                        | Study population                                  |                                                | RR 1.32 (0.50 to 3.52)   | 53 (1 RCT)                      | ⊕⊕⊕⊕ LOW <sup>1</sup>             |
|                                                                                                                                                                                                            | 208 per 1,000                                     | 275 per 1,000 (104 to 733)                     |                          |                                 |                                   |
| Retinopathy of prematurity - Exclusive human milk vs exclusive preterm formula; Observational                                                                                                              | Study population                                  |                                                | RR 0.65 (0.31 to 1.34)   | 1256 (4 observational studies)  | ⊕⊕⊕⊕ VERY LOW <sup>2,3</sup>      |
|                                                                                                                                                                                                            | 329 per 1,000                                     | 214 per 1,000 (102 to 441)                     |                          |                                 |                                   |
| Retinopathy of prematurity - Any human milk vs exclusive preterm formula; Observational                                                                                                                    | Study population                                  |                                                | RR 1.08 (0.79 to 1.48)   | 3576 (6 observational studies)  | ⊕⊕⊕⊕ VERY LOW <sup>2,3</sup>      |
|                                                                                                                                                                                                            | 286 per 1,000                                     | 309 per 1,000 (226 to 423)                     |                          |                                 |                                   |
| Retinopathy of prematurity - Higher vs lower dose human milk intake; RTs                                                                                                                                   | Study population                                  |                                                | RR 1.14 (0.86 to 1.50)   | 1071 (4 RCTs)                   | ⊕⊕⊕⊕ MODERATE <sup>3</sup>        |
|                                                                                                                                                                                                            | 119 per 1,000                                     | 136 per 1,000 (103 to 179)                     |                          |                                 |                                   |
| Retinopathy of prematurity - Higher vs lower dose human milk intake; Observational                                                                                                                         | Study population                                  |                                                | RR 0.82 (0.70 to 0.96)   | 6302 (18 observational studies) | ⊕⊕⊕⊕ VERY LOW <sup>4</sup>        |
|                                                                                                                                                                                                            | 210 per 1,000                                     | 172 per 1,000 (147 to 202)                     |                          |                                 |                                   |
| Retinopathy of prematurity - Unpasteurised vs pasteurised human milk (MOM or donor); RTs                                                                                                                   | Study population                                  |                                                | RR 0.89 (0.35 to 2.26)   | 303 (1 RCT)                     | ⊕⊕⊕⊕ LOW <sup>5</sup>             |
|                                                                                                                                                                                                            | 59 per 1,000                                      | 53 per 1,000 (21 to 134)                       |                          |                                 |                                   |
| Retinopathy of prematurity - Unpasteurised vs pasteurised human milk (MOM or donor); Observational                                                                                                         | Study population                                  |                                                | RR 0.89 (0.33 to 2.38)   | 681 (3 observational studies)   | ⊕⊕⊕⊕ VERY LOW <sup>2,3</sup>      |
|                                                                                                                                                                                                            | 117 per 1,000                                     | 104 per 1,000 (38 to 277)                      |                          |                                 |                                   |
| *The risk in the intervention group (and its 95% confidence interval) is based on the assumed risk in the comparison group and the relative effect of the intervention (and its 95% CI).                   |                                                   |                                                |                          |                                 |                                   |
| CI: Confidence interval; RR: Risk ratio; OR: Odds ratio;                                                                                                                                                   |                                                   |                                                |                          |                                 |                                   |
| GRADE Working Group grades of evidence                                                                                                                                                                     |                                                   |                                                |                          |                                 |                                   |
| High certainty: We are very confident that the true effect lies close to that of the estimate of the effect                                                                                                |                                                   |                                                |                          |                                 |                                   |
| Moderate certainty: We are moderately confident in the effect estimate: The true effect is likely to be close to the estimate of the effect, but there is a possibility that it is substantially different |                                                   |                                                |                          |                                 |                                   |
| Low certainty: Our confidence in the effect estimate is limited: The true effect may be substantially different from the estimate of the effect                                                            |                                                   |                                                |                          |                                 |                                   |
| Very low certainty: We have very little confidence in the effect estimate: The true effect is likely to be substantially different from the estimate of effect                                             |                                                   |                                                |                          |                                 |                                   |

**Footnotes:** <sup>1</sup>Wide CIs; only 1 study; small sample; <sup>2</sup>Substantial heterogeneity; <sup>3</sup>Wide CI; <sup>4</sup>Moderate heterogeneity; <sup>5</sup>Only 1 study, wide CIs.

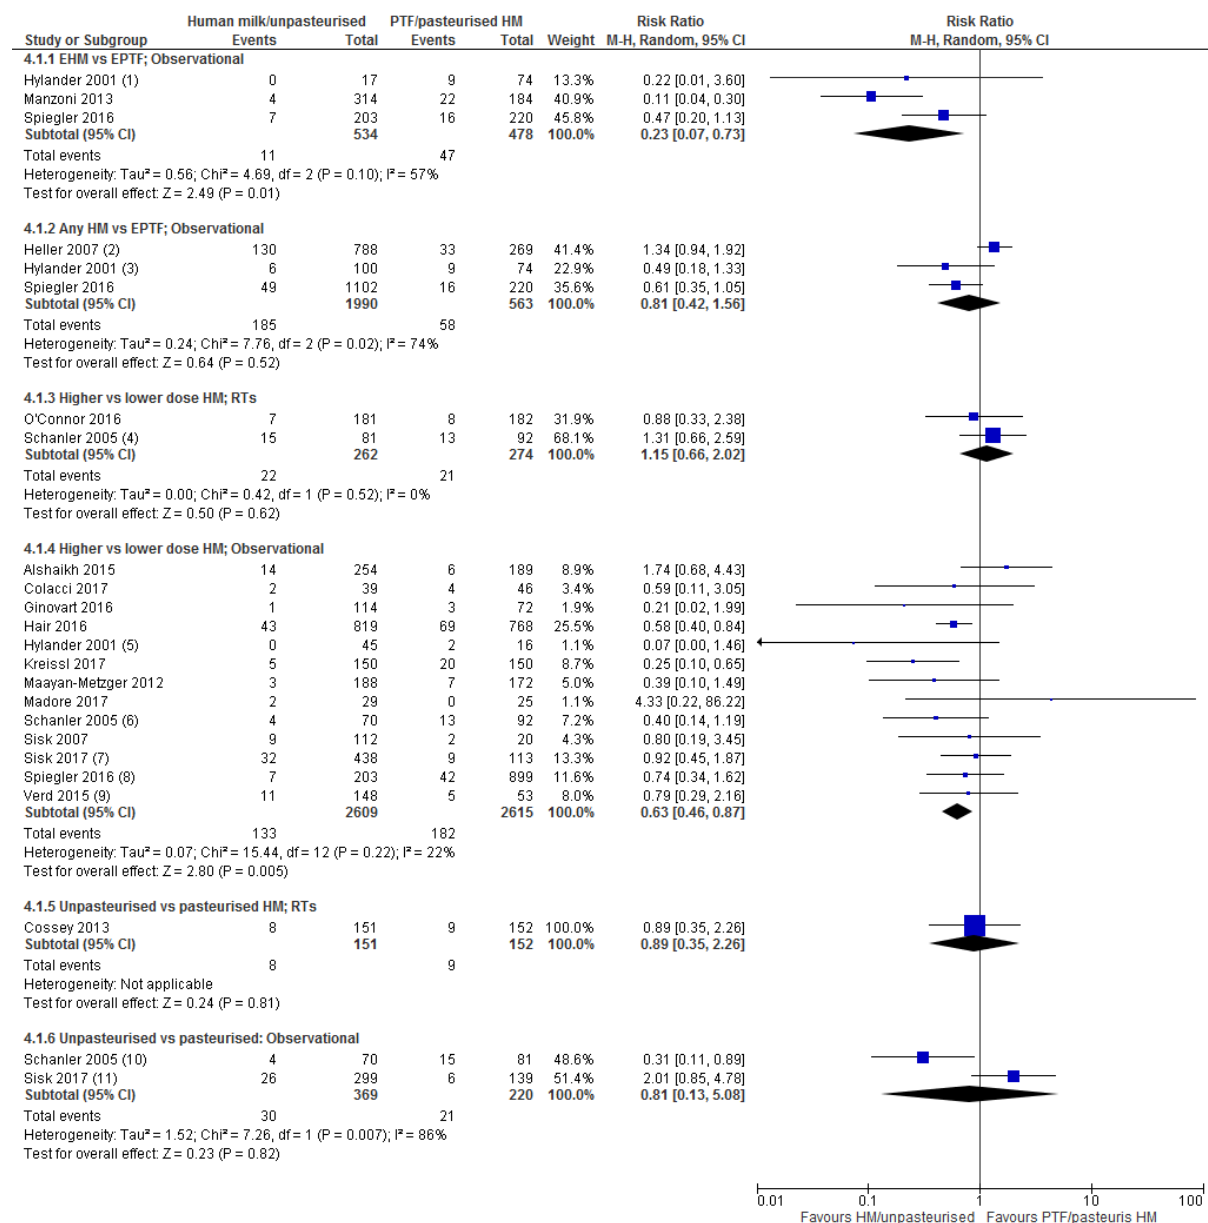

#### Footnotes

- (1) Group '100% HM' compared with EPTF group
- (2) Incidence calculated from odds ratio
- (3) Groups 0-19%, 20-79%, 80-99% and 100% were collapsed for 'any human milk' and cf EPTF
- (4) Groups 'PDM'(higher dose) cf group 'PTF as supplement to MOM' (lower dose)
- (5) Group 0-19% (lower dose HM) compared with group 80-99% and group 100% (higher dose HM)
- (6) Group MOM (high dose) cf with group PTF (low dose). MOM group not randomised
- (7) Groups '≥50% MOM' and '≥50% PDHM' combined for high dose and cf '≥50% EPTF'
- (8) EHM = higher dose HM; mixed feeding = lower dose HM; grande 3/4
- (9) Data derived from inverse of 'no ROP'; EHM = higher dose HM; mixed feeding = lower dose HM
- (10) MOM non-randomised
- (11) Group '≥50% MOM' cf '≥50% PDHM'

**Figure S3. Forest plot of relative risk for the association between human milk and severe retinopathy of prematurity**

Table S8. Severe retinopathy of prematurity: summary of findings

| Comparisons                                                                                                                                                                                                | Anticipated absolute effects* (95% CI)               |                                                   | Relative effect (95% CI)  | № of participants (studies)        | Certainty of the evidence (GRADE) |
|------------------------------------------------------------------------------------------------------------------------------------------------------------------------------------------------------------|------------------------------------------------------|---------------------------------------------------|---------------------------|------------------------------------|-----------------------------------|
|                                                                                                                                                                                                            | Risk with preterm formula/<br>pasteurised human milk | Risk with human milk/<br>Unpasteurised human milk |                           |                                    |                                   |
| Severe ROP - EHM vs EPTF;<br>Observational                                                                                                                                                                 | Study population                                     |                                                   | RR 0.23<br>(0.07 to 0.73) | 1012<br>(3 observational studies)  | ⊕⊕⊕⊕<br>LOW <sup>1</sup>          |
|                                                                                                                                                                                                            | 98 per 1,000                                         | 23 per 1,000<br>(7 to 72)                         |                           |                                    |                                   |
| Severe ROP - Any HM vs EPTF;<br>Observational                                                                                                                                                              | Study population                                     |                                                   | RR 0.81<br>(0.42 to 1.56) | 2553<br>(3 observational studies)  | ⊕⊕⊕⊕<br>VERY LOW 1                |
|                                                                                                                                                                                                            | 103 per 1,000                                        | 83 per 1,000<br>(43 to 161)                       |                           |                                    |                                   |
| Severe ROP - Higher vs lower dose<br>HM; RTs                                                                                                                                                               | Study population                                     |                                                   | RR 1.15<br>(0.66 to 2.02) | 536<br>(2 RCTs)                    | ⊕⊕⊕⊕<br>LOW <sup>2</sup>          |
|                                                                                                                                                                                                            | 77 per 1,000                                         | 88 per 1,000<br>(51 to 155)                       |                           |                                    |                                   |
| Severe ROP - Higher vs lower dose<br>HM; Observational                                                                                                                                                     | Study population                                     |                                                   | RR 0.63<br>(0.46 to 0.87) | 5224<br>(13 observational studies) | ⊕⊕⊕⊕<br>LOW                       |
|                                                                                                                                                                                                            | 70 per 1,000                                         | 44 per 1,000<br>(32 to 61)                        |                           |                                    |                                   |
| Severe ROP - Unpasteurised vs<br>pasteurised HM; RTs                                                                                                                                                       | Study population                                     |                                                   | RR 0.89<br>(0.35 to 2.26) | 303<br>(1 RCT)                     | ⊕⊕⊕⊕<br>HIGH                      |
|                                                                                                                                                                                                            | 59 per 1,000                                         | 53 per 1,000<br>(21 to 134)                       |                           |                                    |                                   |
| Severe ROP - Unpasteurised vs<br>pasteurised: Observational                                                                                                                                                | Study population                                     |                                                   | RR 0.81<br>(0.13 to 5.08) | 589<br>(2 observational studies)   | ⊕⊕⊕⊕<br>VERY LOW <sup>1</sup>     |
|                                                                                                                                                                                                            | 95 per 1,000                                         | 77 per 1,000<br>(12 to 485)                       |                           |                                    |                                   |
| *The risk in the intervention group (and its 95% confidence interval) is based on the assumed risk in the comparison group and the relative effect of the intervention (and its 95% CI).                   |                                                      |                                                   |                           |                                    |                                   |
| CI: Confidence interval; RR: Risk ratio; OR: Odds ratio;                                                                                                                                                   |                                                      |                                                   |                           |                                    |                                   |
| GRADE Working Group grades of evidence                                                                                                                                                                     |                                                      |                                                   |                           |                                    |                                   |
| High certainty: We are very confident that the true effect lies close to that of the estimate of the effect                                                                                                |                                                      |                                                   |                           |                                    |                                   |
| Moderate certainty: We are moderately confident in the effect estimate: The true effect is likely to be close to the estimate of the effect, but there is a possibility that it is substantially different |                                                      |                                                   |                           |                                    |                                   |
| Low certainty: Our confidence in the effect estimate is limited: The true effect may be substantially different from the estimate of the effect                                                            |                                                      |                                                   |                           |                                    |                                   |
| Very low certainty: We have very little confidence in the effect estimate: The true effect is likely to be substantially different from the estimate of effect                                             |                                                      |                                                   |                           |                                    |                                   |

**Footnotes:** <sup>1</sup>Substantial heterogeneity; <sup>2</sup>Wide CIs, only 2 studies; <sup>3</sup>Cossey et al 2013 did not blind participants and personnel, however not downgraded for this as outcome is objective, outcome assessors were blinded, and bias is unlikely.

Table S9. Neurodevelopment: summary of findings

| Outcomes                                                                                                            | Anticipated absolute effects* (95% CI)                                                                                   |                                            | Relative effect (95% CI) | No of participants (studies)   | Certainty of the evidence (GRADE) |
|---------------------------------------------------------------------------------------------------------------------|--------------------------------------------------------------------------------------------------------------------------|--------------------------------------------|--------------------------|--------------------------------|-----------------------------------|
|                                                                                                                     | Risk with preterm formula                                                                                                | Risk with human milk                       |                          |                                |                                   |
| <b>Neurodevelopment – Cognition &lt;18 months: Any human milk vs exclusive preterm formula; Observational</b>       | The mean neurodevelopment – Cognition <18 months: Any human milk vs exclusive preterm formula; Observational was 0       | MD 9 higher (1.42 higher to 16.58 higher)  | -                        | 39 (1 observational study)     | ⊕⊕⊕⊕<br>VERY LOW <sup>1</sup>     |
| <b>Neurodevelopment – Cognition 18 to &lt;36 months: Any human milk vs exclusive preterm formula; observational</b> | The mean neurodevelopment – Cognition 18 to <36 months: Any human milk vs exclusive preterm formula; observational was 0 | MD 2.01 higher (1.35 lower to 5.36 higher) | -                        | 1744 (3 observational studies) | ⊕⊕⊕⊕<br>VERY LOW <sup>2</sup>     |
| <b>Neurodevelopment – Cognition &lt;18 months: Higher vs lower dose human milk; Observational</b>                   | The mean neurodevelopment – Cognition <18 months: Higher vs lower dose human milk; Observational was 0                   | MD 0.67 higher (2.68 lower to 4.03 higher) | -                        | 684 (5 observational studies)  | ⊕⊕⊕⊕<br>VERY LOW <sup>2</sup>     |
| <b>Neurodevelopment – Cognition 18 to &lt;36 months: Higher vs lower dose human milk; RT</b>                        | The mean neurodevelopment – Cognition 18 to <36 months: Higher vs lower dose human milk; RT was 0                        | MD 1.6 lower (5.95 lower to 2.75 higher)   | -                        | 299 (1 RCT)                    | ⊕⊕⊕⊕<br>MODERATE <sup>3</sup>     |
| <b>Neurodevelopment – Cognition 18 to 36 months: Higher vs lower dose human milk; observational</b>                 | The mean neurodevelopment – Cognition 18 to 36 months: Higher vs lower dose human milk; observational was 0              | MD 0.59 lower (3.41 lower to 2.24 higher)  | -                        | 722 (4 observational studies)  | ⊕⊕⊕⊕<br>VERY LOW <sup>2</sup>     |
| <b>Neurodevelopment – Cognition &gt;3 years: Higher vs lower dose human milk; Observational</b>                     | The mean neurodevelopment – Cognition >3 years: Higher vs lower dose human milk; Observational was 0                     | MD 6.4 higher (5.8 lower to 18.6 higher)   | -                        | 18 (1 observational study)     | ⊕⊕⊕⊕<br>VERY LOW <sup>1</sup>     |
| <b>Neurodevelopment – Motor 18 to &lt;36 months: Any human milk vs exclusive preterm formula; Observational</b>     | The mean neurodevelopment – Motor 18 to <36 months: Any human milk vs exclusive preterm formula; Observational was 0     | MD 0.8 lower (6.02 lower to 4.42 higher)   | -                        | 1744 (3 observational studies) | ⊕⊕⊕⊕<br>VERY LOW <sup>2,3</sup>   |
| <b>Neurodevelopment – Motor 18 to &lt;36 months: Higher vs lower dose human milk; RT</b>                            | The mean neurodevelopment – Motor: Higher vs lower dose human milk; RT was 0                                             | MD 2.2 lower (6.42 lower to 2.02 higher)   | -                        | 299 (1 RCT)                    | ⊕⊕⊕⊕<br>MODERATE <sup>1</sup>     |
| <b>Neurodevelopment – Motor&lt;18 months: Higher vs lower dose human milk; Observational</b>                        | The mean neurodevelopment – Motor<18 months: Higher vs lower dose human milk; Observational was 0                        | MD 0.33 lower (4.8 lower to 4.14 higher)   | -                        | 684 (5 observational studies)  | ⊕⊕⊕⊕<br>VERY LOW <sup>2,4</sup>   |

| Outcomes                                                                                                                                                                                                   | Anticipated absolute effects* (95% CI)                                                                   |                                          | Relative effect (95% CI) | № of participants (studies)   | Certainty of the evidence (GRADE) |
|------------------------------------------------------------------------------------------------------------------------------------------------------------------------------------------------------------|----------------------------------------------------------------------------------------------------------|------------------------------------------|--------------------------|-------------------------------|-----------------------------------|
|                                                                                                                                                                                                            | Risk with preterm formula                                                                                | Risk with human milk                     |                          |                               |                                   |
| <b>Neurodevelopment – Motor 18 to &lt;36 months: Higher vs lower dose human milk; observational</b>                                                                                                        | The mean neurodevelopment – Motor 18 to <36 months: Higher vs lower dose human milk; observational was 0 | MD 1.94 lower (4.78 lower to 0.9 higher) | -                        | 722 (4 observational studies) | ⊕⊕⊕⊕<br>VERY LOW <sup>2</sup>     |
| *The risk in the intervention group (and its 95% confidence interval) is based on the assumed risk in the comparison group and the relative effect of the intervention (and its 95% CI).                   |                                                                                                          |                                          |                          |                               |                                   |
| CI: Confidence interval; RR: Risk ratio; OR: Odds ratio;                                                                                                                                                   |                                                                                                          |                                          |                          |                               |                                   |
| GRADE Working Group grades of evidence                                                                                                                                                                     |                                                                                                          |                                          |                          |                               |                                   |
| High certainty: We are very confident that the true effect lies close to that of the estimate of the effect                                                                                                |                                                                                                          |                                          |                          |                               |                                   |
| Moderate certainty: We are moderately confident in the effect estimate: The true effect is likely to be close to the estimate of the effect, but there is a possibility that it is substantially different |                                                                                                          |                                          |                          |                               |                                   |
| Low certainty: Our confidence in the effect estimate is limited: The true effect may be substantially different from the estimate of the effect                                                            |                                                                                                          |                                          |                          |                               |                                   |
| Very low certainty: We have very little confidence in the effect estimate: The true effect is likely to be substantially different from the estimate of effect                                             |                                                                                                          |                                          |                          |                               |                                   |

Footnotes: <sup>1</sup>Only 1 study; <sup>2</sup>Wide Cis; <sup>3</sup>Only 1 study, wide Cis; <sup>4</sup>Moderate heterogeneity
